# Supplementary material for: The benefits of combining 1D and 3D nanofillers in a piezocomposite nanogenerator for biomechanical energy harvesting
Source: Royal Society of Chemistry journal article supplement (doi:10.1039/d2na00429a), 2022-01-01
Supplement: d2na00429a1.pdf [file d2na00429a1.pdf]

## Supplementary Information

### The benefits of combining 1D and 3D nanofilers in piezocomposite nanogenerator for biomechanical energy harvesting

Zouhair Hanani,<sup>a,b,c,\*</sup> Ilyasse Izanzar,<sup>a</sup> Soukaina Merselmiz,<sup>a</sup> M'barek Amjoud,<sup>a</sup> Daoud Mezzane,<sup>a,d</sup> Jaafar Ghanbaja,<sup>e</sup> Ismael Saadoune,<sup>a,f</sup> Mohammed Lahcini,<sup>a,f</sup> Matjaž Spreitzer,<sup>c</sup> Damjan Vengust,<sup>c</sup> Mimoun El Marssi,<sup>d</sup> Zdravko Kutnjak,<sup>c</sup> Igor A. Luk'yanchuk,<sup>d,h</sup> and Mohamed Gouné<sup>b</sup>

<sup>a</sup> IMED-Lab, Cadi Ayyad University, Marrakesh, 40000, Morocco

<sup>b</sup> ICMCB, University of Bordeaux, Pessac, 33600, France

<sup>c</sup> Jozef Stefan Institute, Ljubljana, 1000, Slovenia

<sup>d</sup> LPMC, University of Picardy Jules Verne, Amiens, 80039, France

<sup>e</sup> IJL, University of Lorraine, 54000, Nancy, France

<sup>f</sup> Mohammed VI Polytechnic University, Ben Guerir, 43150, Morocco

<sup>g</sup> Department of Building Materials, Kyiv National University of Construction and Architecture, Kyiv, 03680, Ukraine

\* Corresponding author: e-mail: [zouhair.hanani@ijs.si](mailto:zouhair.hanani@ijs.si)

## S1. Reagents and materials

Barium acetate (ACS reagent, 99.0–102.0%) was obtained from Alfa Aesar. Calcium nitrate tetrahydrate (ACS reagent, 99%), ethanol (laboratory reagent, 96%), sodium hydroxide pellets (puriss. p.a. ACS reagent, ≥98%), hydrochloric acid (ACS reagent, 37%) and dichloromethane (ACS reagent, ≥99.9 %) were purchased from Sigma Aldrich. Deionised water (DI, the resistivity of  $18.2 \text{ M}\Omega \text{ cm}^{-1}$ ) was obtained from a PURELAB-classic water purification system (ELGA LabWater). Polylactic acid (PLA) with reference Ingeo™ Biopolymer 6201D was purchased from NatureWorks. Commercially available Cu foil (>99.99%, 9  $\mu\text{m}$  thickness) was purchased from MTI corporation.

## S2. Confirmation of the composition of the BCZT multipods

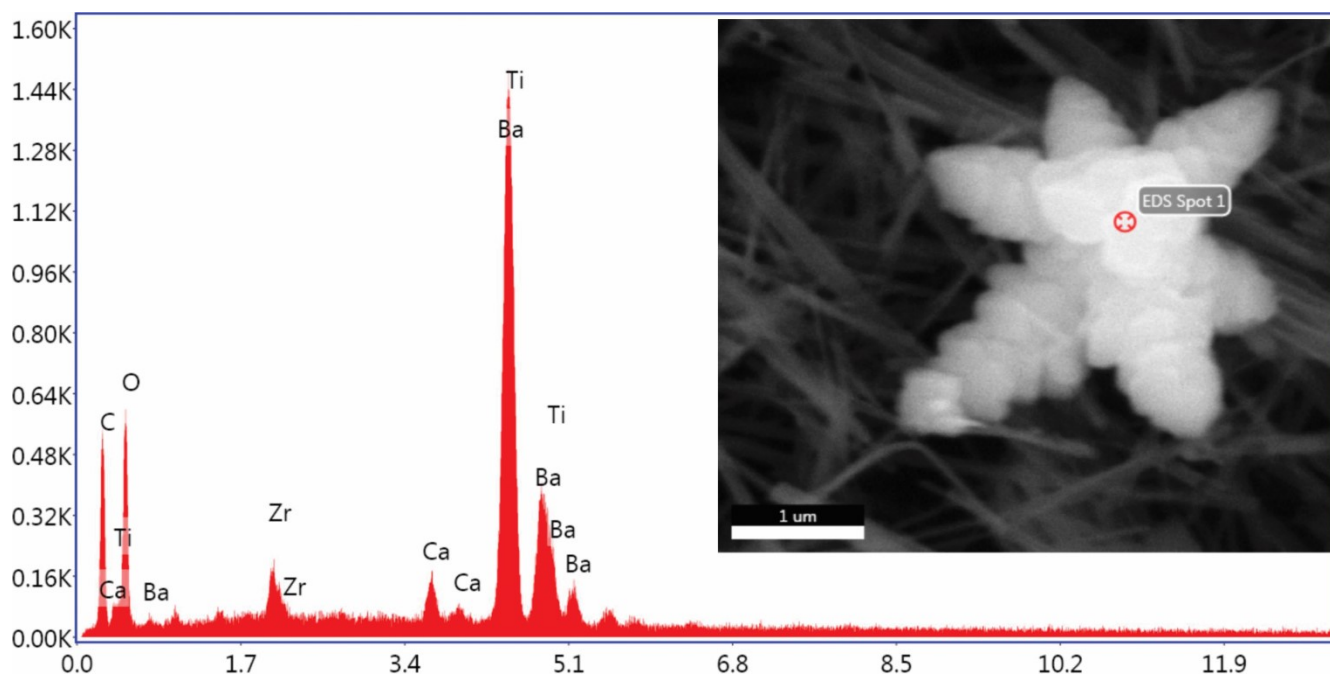

**Fig. S1** Chemical composition of the multipods. The results of the Energy Dispersive X-ray (EDX) analysis (in inset SEM image of a single multipod).

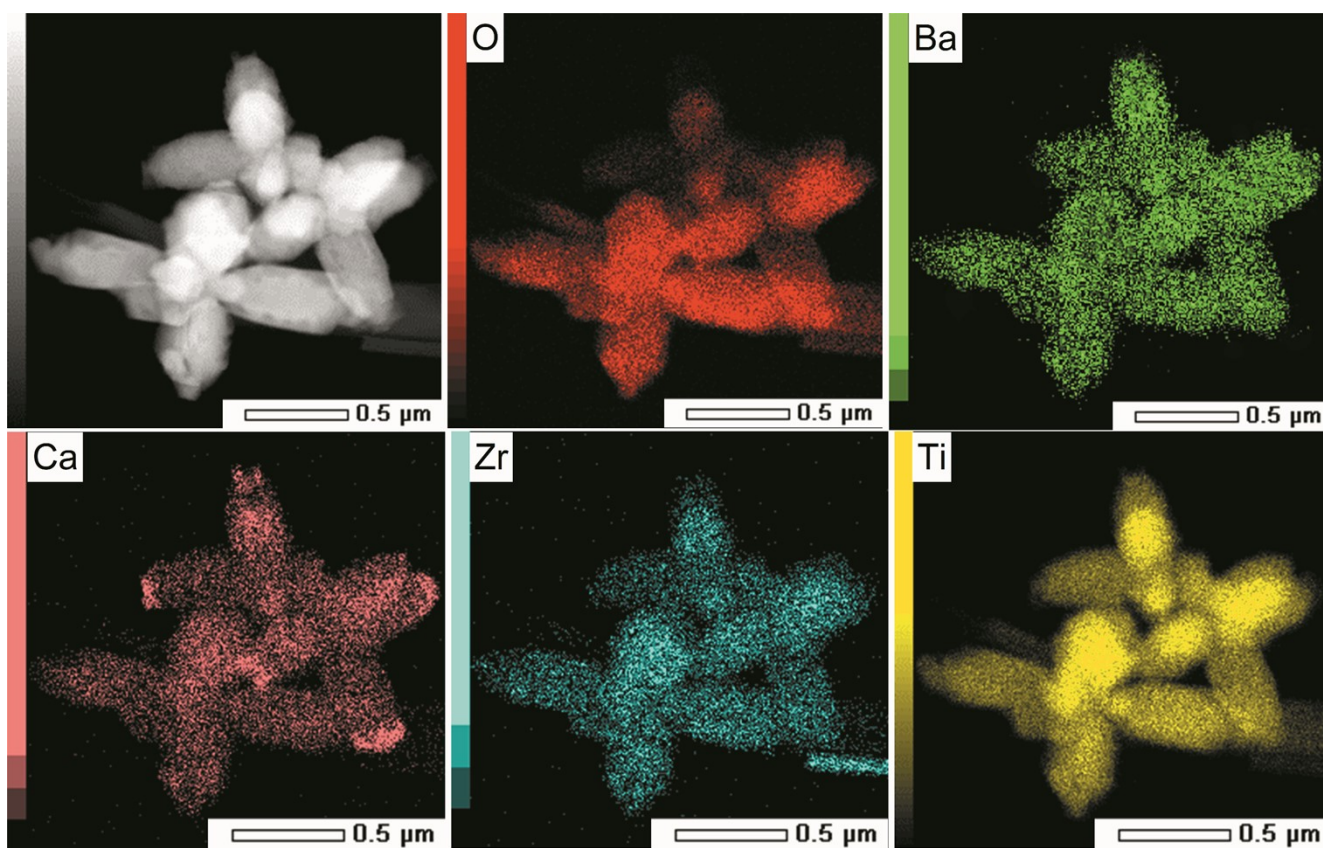

**Fig. S2** TEM images and EDX elemental mapping images of the BCZT multipods. The red, green, pink, blue and yellow areas correspond to O, Ba, Ca, Zr, Ti elements, respectively.

### S3. Thickness of the 20 vol% HZTO-nw+BCZT-mp/PLA film

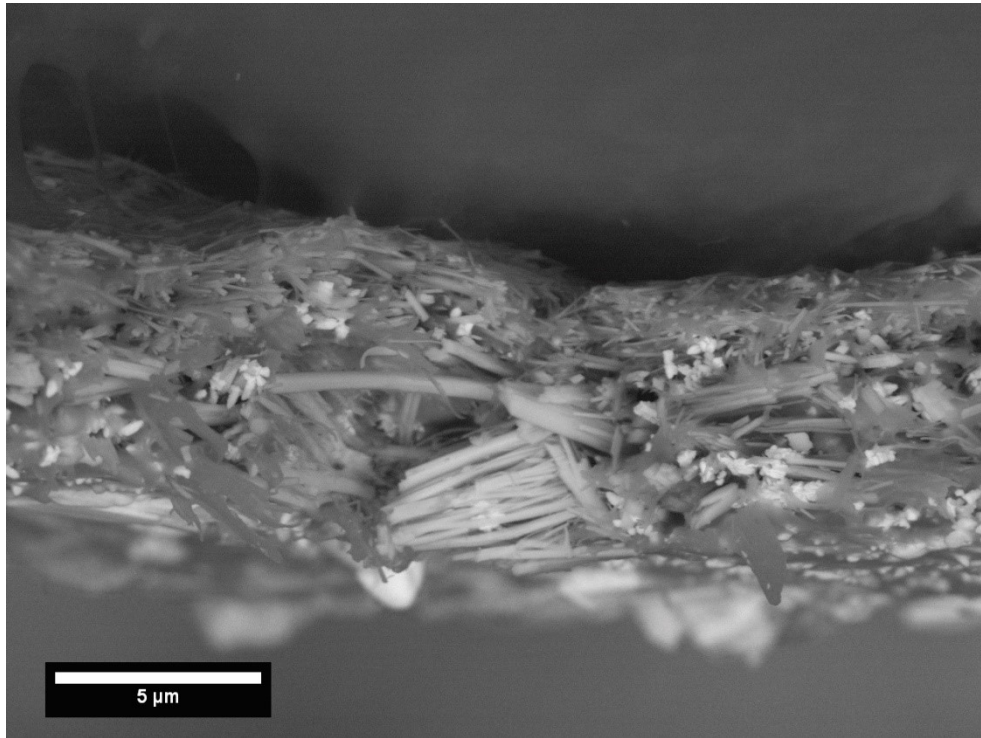

Fig. S3 Low-magnification view of the cross-section of the 20 vol% HZTO-nw+BCZT-mp/PLA film.

### S4. Thermal and mechanical properties of PLA and HZTO-nw+BCZT-mp/PLA nanocomposite films

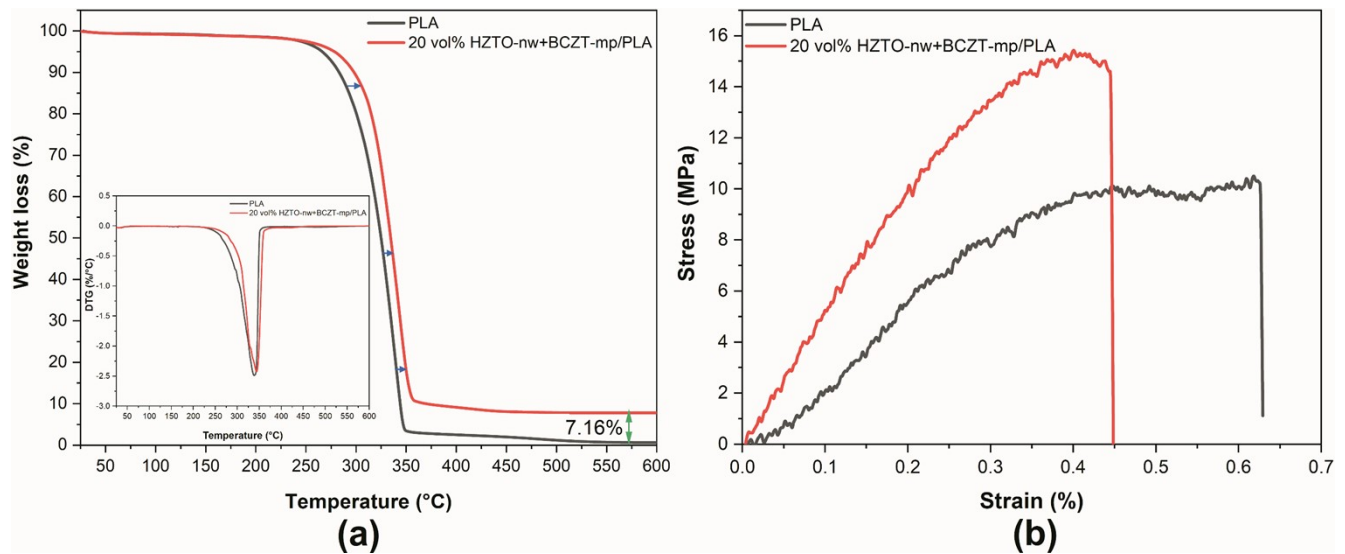

Fig. S4 (a) The thermogravimetric (TG) curves (in inset their respective derivative thermogravimetric (DTG) curves), (b) typical stress–strain curves of neat PLA and 20 vol% HZTO-nw+BCZT-mp/PLA films.

### S5. Effect of HZTO-nw+BCZT-mp concentration

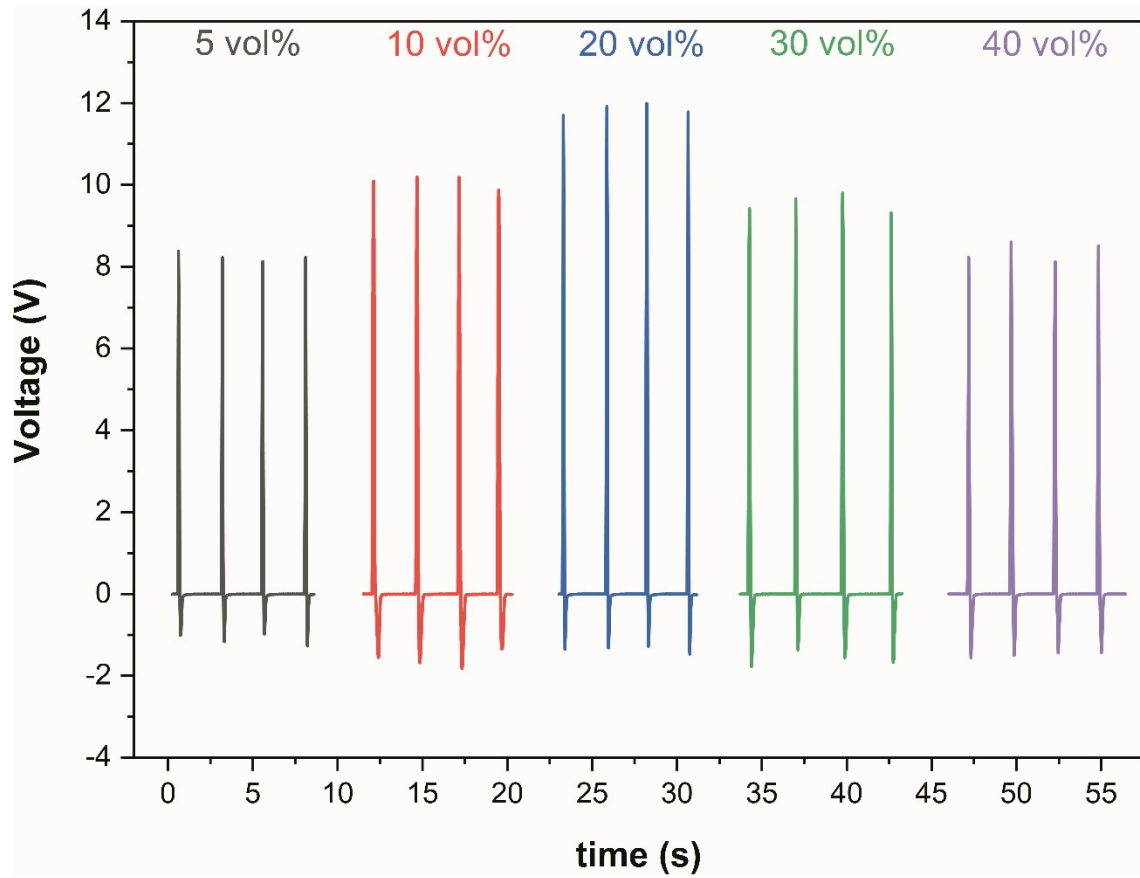

**Fig. S5** The output voltage of HZTO-nw+BCZT-mp/PLA nanocomposite film-based nanogenerators with different filler concentrations.



### S6. Simulation of the mechanical stress and the piezoelectric potential of c-PNG

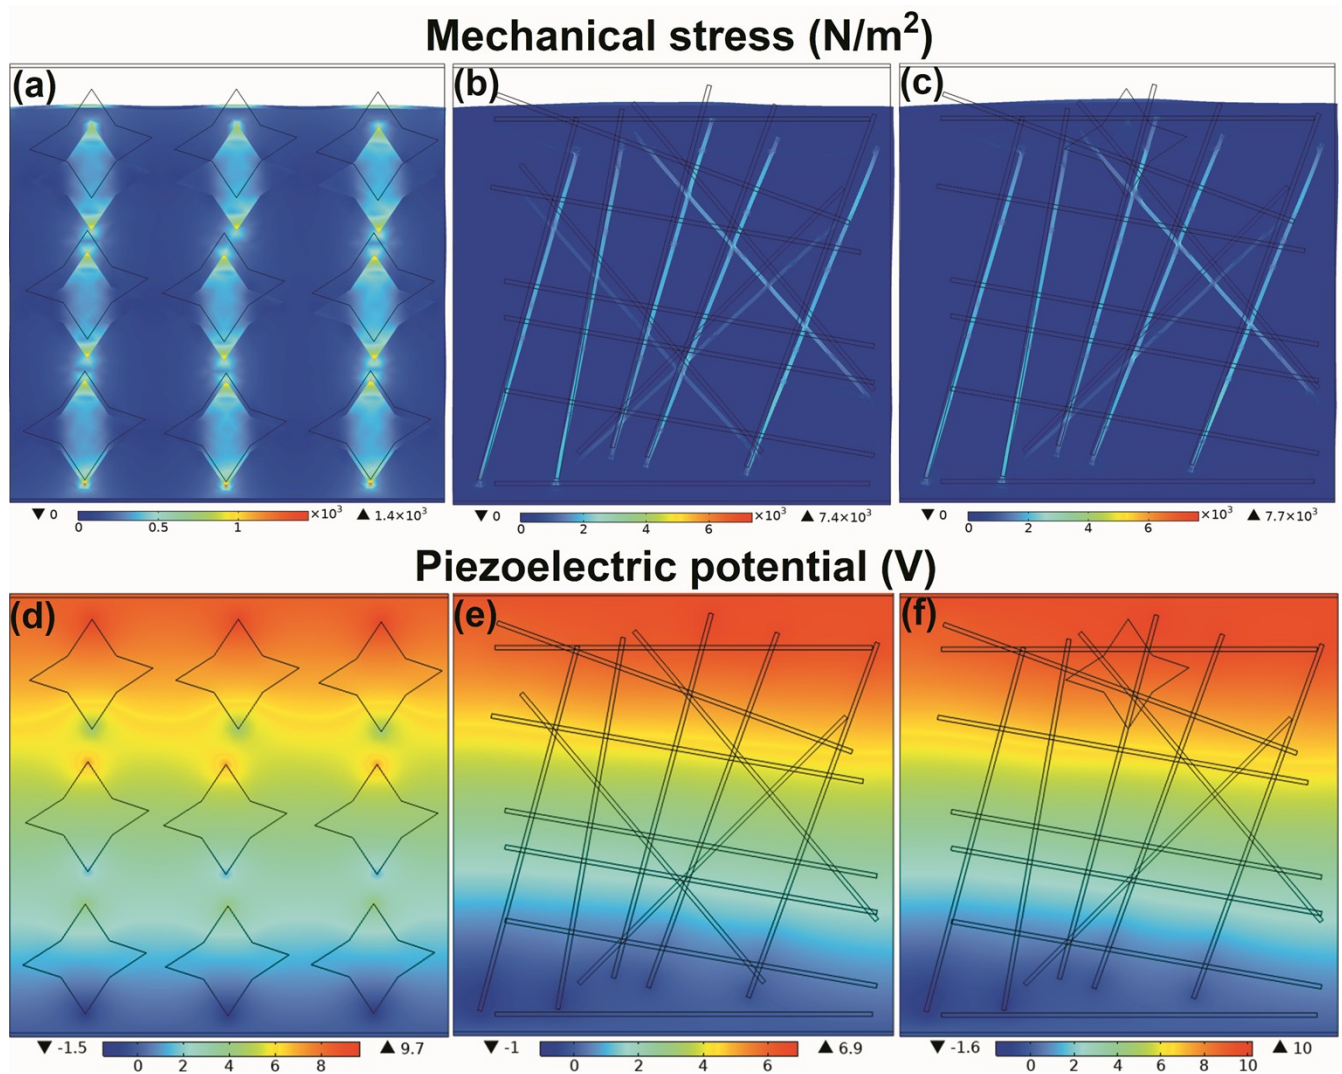

**Fig. S6** The simulated distribution by FEA of (a–c) mechanical stress and (d–f) piezoelectric potential under a compression of 2 N of c-PNG using different fillers.

### S7. The dynamic pressure sensitivity of the c-PNG

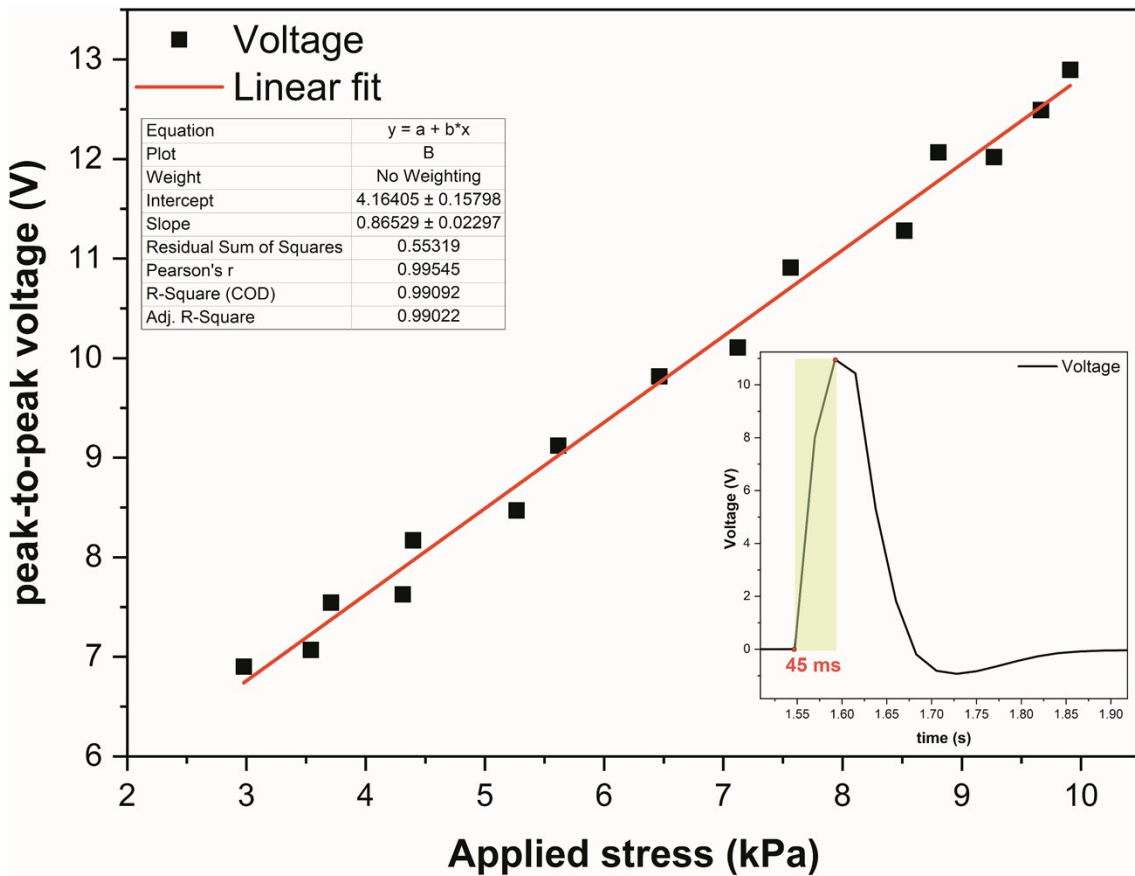

**Fig. S7** The dynamic pressure sensitivity of the c-PNG at low mechanical stress (in the upper inset the fitting results, and in the bottom inset enlarged view of the peak voltage under 10.5 kPa at 1 Hz).

## S8. The voltage-stability test of the c-PNG under finger bending/unbending motions

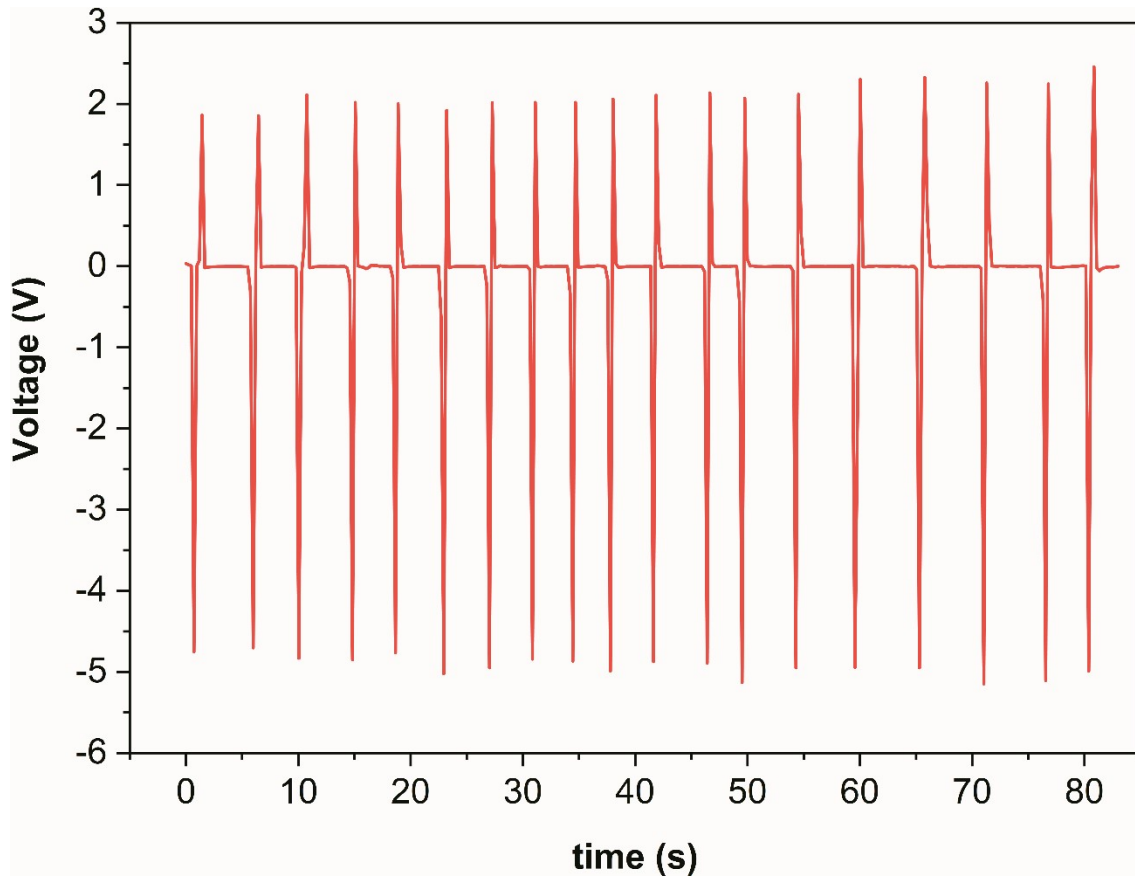

Fig. S8 The voltage-stability test of the c-PNG under finger bending/unbending motions.

## S9. Supporting videos

- **Video S1:** Effect of pressing amplitude.
- **Video S2:** Effect of pressing duration.
- **Video S3:** Lighting a red LED using finger bending.
- **Video S4:** Lighting a red LED using finger tapping.
- **Video S5:** Lighting one blue LED (part 1) and two blue LEDs (part 2) using hand slapping.
- **Video S6:** Driving a calculator using hand slapping.
